# Supplementary material
Source: HighWire-hosted journal article supplement (http://rc.rcjournal.com/highwire/filestream/25883/field_highwire_adjunct_files/0/RC-01540.R1_Joffe_supplement.pdf)
Supplement: RC-01540.R1_Joffe_supplement.pdf [file RC-01540.R1_Joffe_supplement.pdf]

**Appendix A**

**Airway Management Training During Non-Anesthesia Based Critical Care Fellowships**

1. **Program Name:**

2. **Program Type:**

- Combined pulmonary/CCM (3 year)
- Multidisciplinary CCM (2 year)
- Other: \_\_\_\_\_

3. **Does your program have a defined airway management rotation?**

- Yes
- No

4. **What year of your fellowship is it offered?**

- First
- Second
- Third
- N/A
- Other: \_\_\_\_\_

5. **How much time is spent in this rotation?**

- Less than 1 month
- 1 month
- 2 months
- N/A
- Other: \_\_\_\_\_

**6. How does your fellowship document the number of supervised airway procedures? Please choose all that apply.**

- Procedure log submitted to program director
- From billing records
- From electronic medical record or automated anesthesia record
- Other means
- Procedures are not documented

**7. Does your program have a designated director of airway education?**

- Yes
- No

**8. What teaching methods are regularly used for teaching airway management? Select all that apply.**

- Printed reading material
- Required reading
- Required numbers of supervised procedures
- Scheduled didactics
- Web or computer-based teaching
- Mannequin training
- Simulation training
- Bedside training in the ICU
- No methods are used regularly
- Other: \_\_\_\_\_

**9. Which of the following SUPRAGLOTTIC AIRWAYS are available for the fellows training and use in or out of the ICU?**

- Laryngeal Mask Airway (LMA) or equivalent
- LMA Proseal or equivalent
- Intubating LMA or equivalent
- i-Gel
- Other
- None

I am not sure

**10. On average, how many supervised uses of supraglottic airways do your fellows perform prior to graduation?**

- 0-10
- 11-20
- 21-50
- 51-75
- Don't know

**11. Which of these DIRECT LARYNGOSCOPY blades are commonly used in your ICUs? Select all that apply.**

- Curved Macintosh blades
- Other curved blades
- Straight Miller blades
- Other straight blades

**12. On average, how many supervised uses of direct laryngoscopy with CURVED blades does each fellow perform prior to graduation?**

- 0-25
- 26-50
- 51-75
- 76-100
- over 100
- Don't know

**13. On average, how many supervised uses of direct laryngoscopy with STRAIGHT blades does each fellow perform prior to graduation?**

- 0-25
- 26-50
- 51-75
- 76-100
- over 100
- Don't know

**14. Which of the following INTUBATING STYLETS (INTRODUCERS) are commonly available and used in your ICUs? Select all that apply.**

- Eschmann stylet ("gum elastic bougie")
- Aintree intubating catheter
- Frova
- Other
- None
- Don't know

**15. On average, how many supervised uses of an intubating stylet does each fellow perform prior to graduation?**

- 0-25
- 26-50
- 51-75
- 76-100
- over 100
- Don't know

**16. Which of the following VIDEO LARYNGOSCOPY devices are commonly available and used in your ICUs? Select all that apply.**

- GlideScope
- Storz C-Mac/V-mac
- McGrath Series 5 (or other)
- Pentax AWS
- Airtraq
- Other
- Don't know

**17. On average, how many supervised uses of a video laryngoscopy device does each fellow perform prior to graduation?**

- 0-10
- 11-30
- 31-50
- 51-75

- over 75
- Don't know

**18. Are FLEXIBLE FIBERSCOPES available in your ICU?**

- Yes
- No

**19. Which of the following FLEXIBLE FIBERSCOPES are available in your ICU?**

- Adult fiberoptic bronchoscope (5.8 mm ED or larger)
- Pediatric or intubating fiberscope (less than 5.8 mm ED)
- None
- Don't know

**20. Are the fellows taught fiberoptic intubation specifically for the purposes of airway management?**

- Yes
- No

**21. On average, how many "ASLEEP" flexible fiberoptic intubations would you estimate your fellows perform prior to graduation?**

- 0-5
- 6-10
- 11-20
- 21-30
- over 30
- Don't know

**22. On average, how many "AWAKE" flexible fiberoptic intubations would you estimate your fellows perform prior to graduation?**

- 0-5
- 6-10

ONLINE DATA SUPPLEMENT

- 11-20
- 21-30
- over 30
- Don't know

**23. In your opinion, how many supervised uses of each technique is required to attain proficiency at each of the following techniques? Assume that all items within a grouping are more or less comparable.**

|                                                               | 0-9                   | 10-19                 | 20-39                 | 40-59                 | 60-79                 | 80-100                | more than 100         | Proficiency in this technique is not required |
|---------------------------------------------------------------|-----------------------|-----------------------|-----------------------|-----------------------|-----------------------|-----------------------|-----------------------|-----------------------------------------------|
| Direct laryngoscopy                                           | <input type="radio"/>                         |
| Intubating stylet aids (e.g. Eschmann, Aintree, etc.)         | <input type="radio"/>                         |
| Video laryngoscopy (e.g. GlidScope, McGrath, Airtraq, etc.)   | <input type="radio"/>                         |
| Supraglottic airways (e.g. LMA, Combitube, i-Gel)             | <input type="radio"/>                         |
| Flexible fiberscope                                           | <input type="radio"/>                         |
| Awake intubation                                              | <input type="radio"/>                         |
| Airway anesthesia                                             | <input type="radio"/>                         |
| Extubation techniques (e.g. tube exchangers, over fiberscope) | <input type="radio"/>                         |
